# Supplementary figures and images for: The antagonistic effect of magnesium hydroxide particles on vascular endothelial activation induced by acidic PLGA degradation products
Source: Royal Society of Chemistry journal article supplement (doi:10.1039/d0bm01656j), 2020-11-27

### A. Cellular component

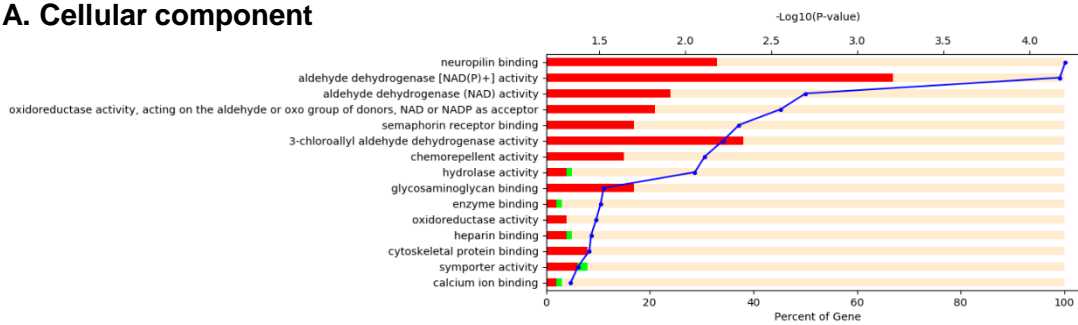

### B. Molecular function

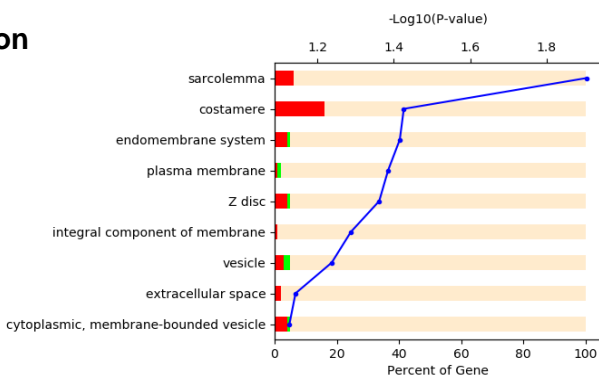

### C. KEGG

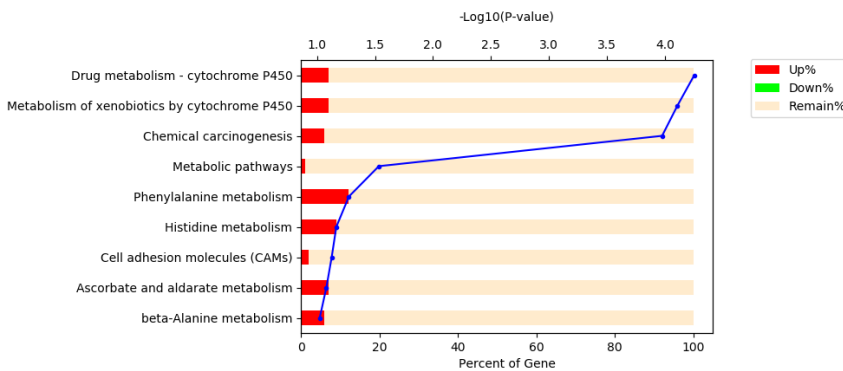

Figure S1

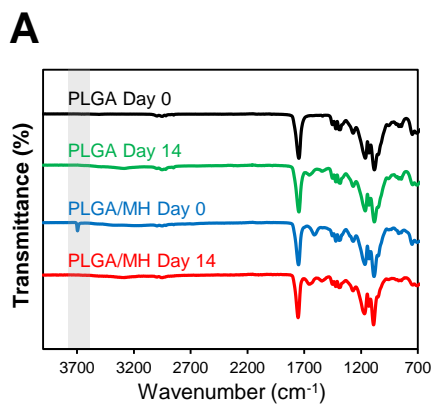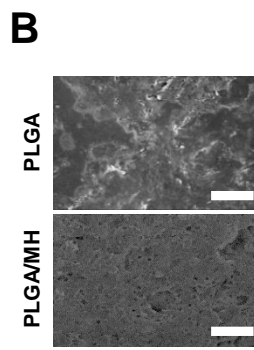

Figure S2

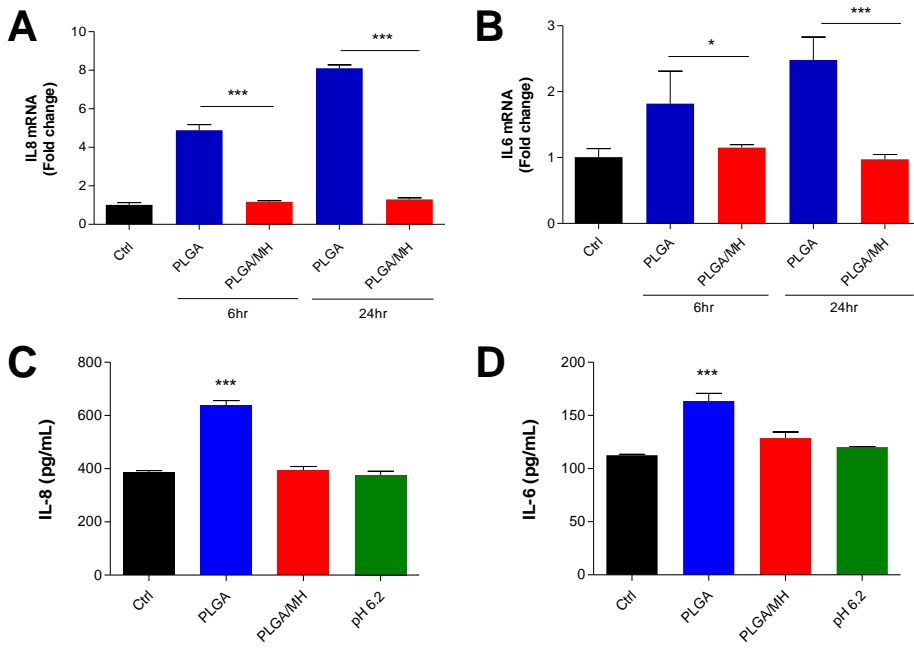

Figure S3

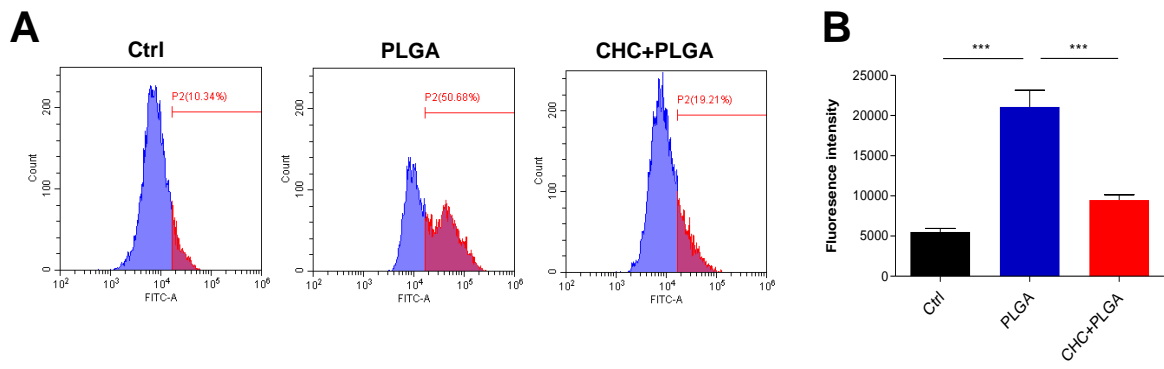

Figure S4

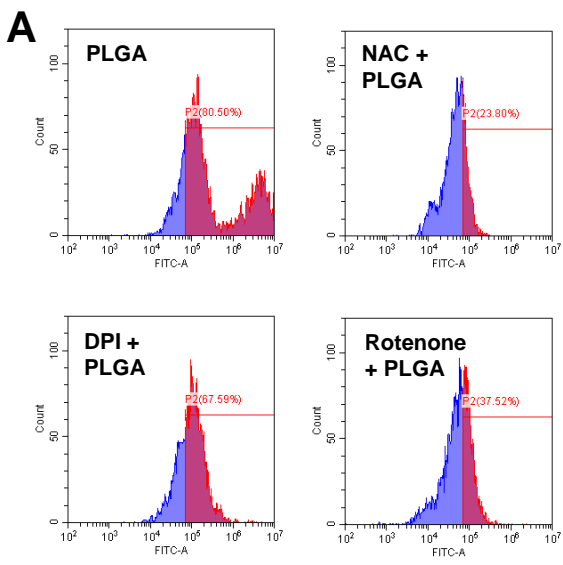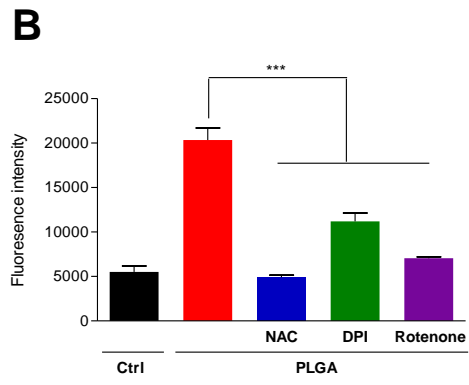

Figure S5

Supplement: d0bm01656j1.pdf [file d0bm01656j1.pdf]
